# Supplementary material for: Structure and properties of multilayered siloxane–organic hybrid films prepared using long-chain organotrialkoxysilanes containing CC double bonds
Source: Royal Society of Chemistry journal article supplement (doi:10.1039/b615027f), 2007-01-01
Supplement: b615027f.pdf [file b615027f.pdf]

Electronic supplementary information (ESI)

## Structure and properties of multilayered siloxane–organic hybrid films prepared using long-chain organotrialkoxysilanes containing C=C double bonds

Atsushi Shimojima, Chia-Wen Wu and Kazuyuki Kuroda

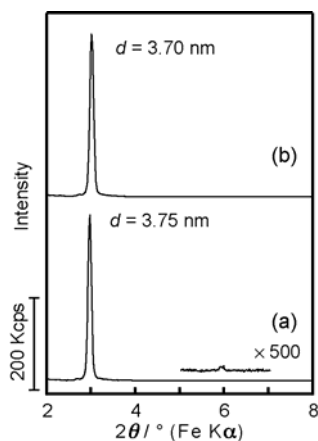

**Fig. S1** XRD patterns of the hybrid film **L0** (a) as-synthesized and (b) UV irradiated for 6h.

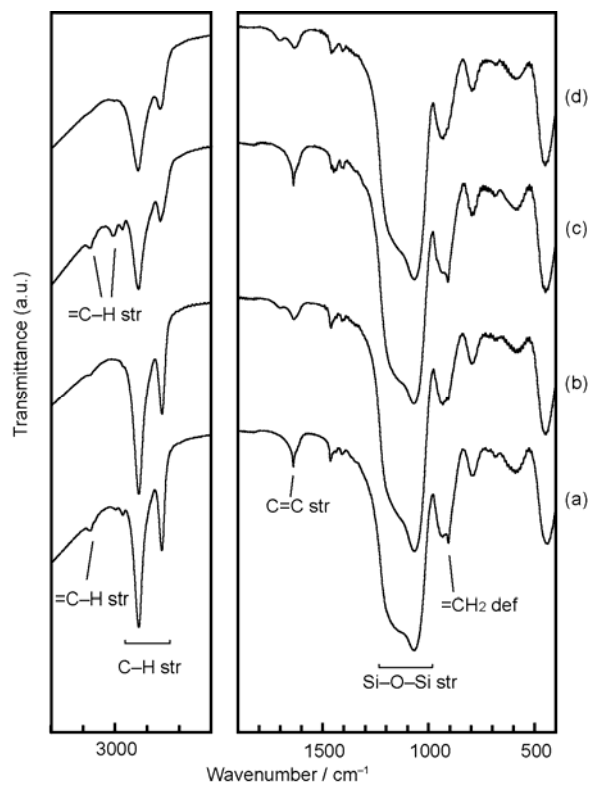

**Fig. S2** FT-IR spectra of **D1**: (a) as-synthesized and (b) UV irradiated for 6 h, **D2**: (c) as-synthesized and (d) UV irradiated for 6 h. The spectra in the range of 2700–3200 cm<sup>-1</sup> are enlarged.
